# Supplementary material for: Effect of Biochar Type, Concentration and Washing Conditions on the Germination Parameters of Three Model Crops
Source: MDPI journal article supplement (doi:10.3390/plants12122235), 2023-06-07
Supplement: s1 [file s1]

**Supplementary Table S1.** Values of pH and EC (mean  $\pm$  SE) in the different soil biochar mixtures.

| % biochar   | pH             |                |                 |                | EC           |             |              |             |
|-------------|----------------|----------------|-----------------|----------------|--------------|-------------|--------------|-------------|
|             | B1             | B1w            | B2              | B2w            | B1           | B1w         | B2           | B2w         |
| <b>0%</b>   | 6 $\pm$ 0.07   | 6.2 $\pm$ 0.1  | 6 $\pm$ 0.07    | 6.2 $\pm$ 0.1  | 395 $\pm$ 3  | 162 $\pm$ 5 | 395 $\pm$ 3  | 162 $\pm$ 5 |
| <b>5%</b>   | 6 $\pm$ 0.03   | 6 $\pm$ 0.12   | 6.5 $\pm$ 0.2   | 6.5 $\pm$ 0.03 | 627 $\pm$ 6  | 206 $\pm$ 4 | 446 $\pm$ 6  | 161 $\pm$ 7 |
| <b>10%</b>  | 6 $\pm$ 0.08   | 6.4 $\pm$ 0.05 | 6.7 $\pm$ 0.06  | 6.5 $\pm$ 0.05 | 620 $\pm$ 33 | 189 $\pm$ 6 | 555 $\pm$ 6  | 150 $\pm$ 8 |
| <b>25%</b>  | 6.6 $\pm$ 0.1  | 6.6 $\pm$ 0.05 | 7.19 $\pm$ 0.05 | 7 $\pm$ 0.34   | 691 $\pm$ 5  | 241 $\pm$ 5 | 604 $\pm$ 3  | 236 $\pm$ 5 |
| <b>50%</b>  | 7.5 $\pm$ 0.03 | 7 $\pm$ 0.14   | 8.2 $\pm$ 0.15  | 7.5 $\pm$ 0.15 | 731 $\pm$ 6  | 271 $\pm$ 6 | 630 $\pm$ 6  | 245 $\pm$ 7 |
| <b>100%</b> | 9.5 $\pm$ 0.02 | 7.8 $\pm$ 0.26 | 10 $\pm$ 0.03   | 7.7 $\pm$ 0.06 | 542 $\pm$ 5  | 164 $\pm$ 5 | 1005 $\pm$ 4 | 259 $\pm$ 5 |
